# Supplementary material for: fMRI-based detection of alertness predicts behavioral response variability
Source: eLife. 2021 May 7;10:e62376. doi: 10.7554/eLife.62376 (PMC8104962; doi:10.7554/eLife.62376)
Supplement: Supplementary file 1. — ‘x’ indicates whether a subject contributed an eyes-closed resting state (ECR) scan and/or an eyes-closed auditory task (ECT) scan. Some subjects did not complete both ECR and ECT scans. [file elife-62376-supp1.xlsx]

## Sheet: Sheet1
Subject	ECR	ECT
1		x
2		x
3	x	x
4	x	x
5	x	x
6		x
7	x	x
8	x
9	x	x
10	x	x
11	x
12	x	x
13	x	x
14	x	x
‘x’ indicates whether a subject contributed an eyes-closed resting state (ECR) scan and/or an eyes-closed auditory task (ECT) scan. Some subjects did not complete both ECR and ECT scans.
