# Supplementary material for: fMRI-based detection of alertness predicts behavioral response variability
Source: eLife. 2021 May 7;10:e62376. doi: 10.7554/eLife.62376 (PMC8104962; doi:10.7554/eLife.62376)
Supplement: Supplementary file 2. — Resting- state scans and task scans were broken down into two non-overlapping subgroups so that one subject’s rest and task scans did not cross into a different group. [file elife-62376-supp2.xlsx]

## Sheet: Sheet1
Subjects	Rest 1	Rest 2	Task 1	Task 2
subject 1				X
subject 2			X
subject 3	X		X
subject 4	X		X
subject 5	X		X
subject 6			X
subject 7	X		X
subject 8	X
subject 9		X		X
subject 10		X		X
subject 11		X
subject 12		X		X
subject 13		X		X
Subject 14		X		X
Total Subjects	5	6	6	6
