# Supplementary material for: fMRI-based detection of alertness predicts behavioral response variability
Source: eLife. 2021 May 7;10:e62376. doi: 10.7554/eLife.62376 (PMC8104962; doi:10.7554/eLife.62376)
Supplement: Supplementary file 3. [file elife-62376-supp3.xlsx]

## Sheet: Sheet1
	Subjects	Max ∆ Disp (mm)
	subject 1 task	0.744
	subject 2 task	1.622
	subject 3 rest	0.427
	subject 3 task	0.637
	subject 4 rest	0.642
	subject 4 task	0.292
	subject 5 rest	5.287
	subject 5 task	1.335
	subject 6 task	0.683
	subject 7 rest	1.447
	subject 7 task	0.96
	subject 8 rest	0.723
	subject 9 rest	0.429
	subject 9 task	2.052
	subject 10 rest	2.383
	subject 10 task	3.557
	subject 11 rest	0.799
	subject 12 rest	0.544
	subject 12 task	0.568
	subject 13 rest	1.147
	subject 13 task	1.147
	subject 14 rest	1.194
	subject 14 task	0.583
